# Supplementary material
Source: PubMed Central journal article supplement (PMC4582154)
Supplement: ijbsv11p1306s1.pdf [file ijbsv11p1306s1.pdf]

Table S1. List of primers used for the qRT-PCR determination of genes.

| Vectorbase <sup>‡</sup> | Forward primer (5'-3')    | Reverse primer (5'-3')   |
|-------------------------|---------------------------|--------------------------|
| CPIJ000841              | CTTGATCTGGGCGTGAACA       | TTTTCCATGGGCTCCAAAG      |
| CPIJ001357              | TCGGGATCGTCATCTTCTTC      | GACCGATCGGCAGTGTACG      |
| CPIJ002046              | AATTCCGAACCGTCGTCAC       | GTAGGTCGCGGCATAGCTC      |
| CPIJ003456              | GCACATCCCCGAAGTGTC        | CCAGCTGGGCGTAAATGA       |
| CPIJ003525              | GGCGTAACGTGGATGTTTCT      | ATAAACTTGAACGCCGTTGG     |
| CPIJ003531              | ACGAATCGTACGACCTGGAC      | CTTCTGGCCAAGCTTCAAAC     |
| CPIJ003879              | CAGCTGGCAGTGTTGCTG        | TCCAAGTGGACGGCCTTA       |
| CPIJ003915              | GACGAGCACGTTACGCTCA       | ACGGACCACCAGAGTCACC      |
| CPIJ004290              | AAGGCCGTCGATGACTACG       | AATCCGTTGACGGGATCAG      |
| CPIJ004640              | TTCCAGGTGTCCCTCATCC       | TCAGCGCGTTGTAGTTTGG      |
| CPIJ004660              | GAACCGATTACCGTCCTG        | ATCCACCGCAGAAGTGTCC      |
| CPIJ005273              | GAACCGGCTGACGAGAGTC       | GCGTCCTTTCCCTCCTTCT      |
| CPIJ005473              | CCTGCCGGACAAAGACTAAG      | TCGGGGGTTGTTAGTACCAG     |
| CPIJ005952              | TACGAGCTGGCCCTTAATCCGTTT  | AGACTTTCCGCAGGTGGGTACTTT |
| CPIJ006502              | GTTCCACCACATCCCAACTC      | CGGCTCAAACAGATCAGACA     |
| CPIJ007079              | ATCCATCATCTCGCCCAAG       | TTCAGCTCCAGCAGGGAGT      |
| CPIJ007193              | ACGACGCCCAGTATTACGC       | ATACTTGCGCAGCATCACG      |
| CPIJ007471              | TGGATCTGCTGCGTCTGA        | AGCGCCAGTTTGAGTTGC       |
| CPIJ008286              | GACCGGGAAGTCAGATCCA       | TGCGTTCCAGATGAAGGTG      |
| CPIJ008515              | GATCCTCAGCGATCGAAGC       | CAGCAGCTCGTTGCACACT      |
| CPIJ010190              | AACGCTTCTGCCAGTGTC        | AAAACCACATGCCAGCATTC     |
| CPIJ011837              | TTATTCCGTTCAAGTGGAGGCACGA | TTCAGCAGTGCTTCAAACCGGAAG |
| CPIJ012470              | TGAACGTCCTTAGGGATGGCGAAA  | TTGCTAGTCGCGGAAACGAACTGA |
| CPIJ012707              | CCGACATGGGACCTGTGTA       | CTGCATCGCAGCACATTC       |
| CPIJ012708              | TCCTGCGTTGCTCCAAAT        | GTACCCCGCATTGCAGTC       |
| CPIJ012716              | TGCCATCATTCCCTAGCC        | AGAAGCACTGCACGAAGCA      |
| CPIJ012719              | CTGACCATCGAGCAGCAGA       | CGACGGTCTTTTCCCTGGAC     |
| CPIJ012721              | CCAAGTGTTTCGTGCGTTG       | CCGGTCCGATAGAAGCAC       |
| CPIJ013321              | GCAAACCTCTGCTGGGCTATC     | CGTGTCCAGGTGCTTGTAGA     |
| CPIJ013633              | CCAGGTCTCGTTCCTGCAT       | CAGGTAGGGCTTCCACCAG      |
| CPIJ015385              | GCCAATCCGTGCTTCAAC        | AGGTTCACGGACACCAC        |
| CPIJ015960              | AGTGCATTCGGAGGTCCTTCATGT  | AGACTTGTCACCAGCTTATCGGCA |
| CPIJ016702              | CAGCAGCAGCAAAAAGTGC       | GTGTTCCGACTGGAGACGA      |
| CPIJ019052              | GCCTTGATTTCCGGGACTT       | CGCCCAGATCTTTGTGCTT      |
| CPIJ019581              | CAACTACGAGTGGGGCAAGT      | ACTCAAGACGGCAATGATGA     |
| CPIJ020018              | TGTCCAAGTTTCGGTTCGAGGCTA  | AGGTGATGGCATCCGTTGAGGTAT |
| rRNA                    | CGCGGTAATTCCAGCTCCACTA    | GCATCAAGCGCCACCATATAGG   |

<sup>‡</sup>*Cx. quinquefasciatus* genome Johannesburg strain v1.2, [www.vectorbase.org](http://www.vectorbase.org)

Table S2: Complete list of up- and down-regulated genes for sugar-fed only females for the HAmCq<sup>G8</sup> strain of *Culex quinquefasciatus* for the initial 72h post-eclosion.

| Time interval | SCOP <sup>†</sup> general function      | Gene       | Vectorbase anotation <sup>‡</sup>        | FPKM* (time 1)                             | FPKM (time 2) | Fold change |      |
|---------------|-----------------------------------------|------------|------------------------------------------|--------------------------------------------|---------------|-------------|------|
| 2 to 12h      | General Information                     | CPIJ002675 | glutathione S-transferase 1              | 1.0                                        | 21.8          | 22.5        |      |
|               |                                         | CPIJ009133 | salivary endonuclease                    | 3.2                                        | 94.6          | 29.4        |      |
|               | Intra-cellular processes                | CPIJ001773 | synaptic vesicle protein                 | 0.2                                        | 6.3           | 29.0        |      |
|               |                                         | CPIJ001774 | synaptic vesicle protein                 | 0.3                                        | 5.1           | 17.7        |      |
|               |                                         | CPIJ001775 | synaptic vesicle protein                 | 0.7                                        | 21.9          | 31.0        |      |
|               |                                         | CPIJ008945 | sugar transporter                        | 2.5                                        | 25.7          | 10.3        |      |
|               |                                         | CPIJ008946 | sugar transporter                        | 3.0                                        | 34.3          | 11.3        |      |
|               |                                         | CPIJ017478 | conserved hypothetical protein           | 3.4                                        | 28.0          | 8.3         |      |
|               |                                         | CPIJ019591 | solute carrier family 2                  | 10.8                                       | 125.7         | 11.6        |      |
|               |                                         | CPIJ001239 | cathepsin B                              | 2.0                                        | 96.0          | 49.2        |      |
|               |                                         | CPIJ001240 | cathepsin B-like thiol protease          | 0.4                                        | 7.9           | 21.3        |      |
|               |                                         | CPIJ002595 | zinc carboxypeptidase                    | 1.3                                        | 12.5          | 9.4         |      |
|               |                                         | CPIJ004640 | trypsin 5G1                              | 5.7                                        | 354.0         | 61.8        |      |
|               |                                         | CPIJ004984 | serine protease1/2                       | 1.1                                        | 29.8          | 26.0        |      |
|               |                                         | CPIJ005273 | trypsin 2                                | 2.7                                        | 76.8          | 27.9        |      |
|               |                                         | CPIJ006502 | late trypsin                             | 3.1                                        | 324.9         | 104.5       |      |
|               |                                         | CPIJ007025 | FXa-directed anticoagulant               | 1.7                                        | 43.0          | 24.7        |      |
|               |                                         | CPIJ008388 | aminopeptidase N                         | 0.5                                        | 20.9          | 40.9        |      |
|               |                                         | CPIJ010521 | serine protease inhibitor dipetalogastin | 0.5                                        | 7.4           | 13.6        |      |
|               |                                         | CPIJ011998 | zinc carboxypeptidase A 1                | 2.5                                        | 23.8          | 9.6         |      |
|               |                                         | CPIJ012161 | sphingomyelin phosphodiesterase          | 1.0                                        | 42.5          | 42.6        |      |
|               |                                         | CPIJ014781 | cysteine-rich protease inhibitor         | 0.5                                        | 26.2          | 55.8        |      |
|               |                                         | CPIJ016348 | serine protease1/2                       | 2.5                                        | 243.5         | 97.7        |      |
|               |                                         | CPIJ016937 | coagulation factor X                     | 1.3                                        | 37.5          | 29.6        |      |
|               |                                         | CPIJ017414 | trypsin 4                                | 0.3                                        | 19.6          | 68.3        |      |
|               |                                         | CPIJ017964 | trypsin 7                                | 0.3                                        | 13.0          | 51.6        |      |
|               |                                         | CPIJ017965 | trypsin 7                                | 0.5                                        | 10.0          | 19.5        |      |
|               |                                         | CPIJ018871 | salivary apyrase; 5' nucleotidase        | 0.6                                        | 15.0          | 24.2        |      |
|               |                                         | CPIJ019168 | salivary apyrase                         | 1.3                                        | 12.0          | 9.6         |      |
|               |                                         | Metabolism | CPIJ020192                               | trypsin-like salivary secreted protein     | 0.4           | 14.6        | 36.0 |
|               |                                         |            | CPIJ017521                               | alpha-amylase I                            | 5.7           | 180.2       | 31.6 |
|               |                                         |            | CPIJ011388                               | diazepam binding inhibitor                 | 63.4          | 626.6       | 9.9  |
|               |                                         |            | CPIJ001082                               | cat eye syndrome critical region protein 1 | 3.0           | 36.6        | 12.3 |
|               |                                         |            | CPIJ005463                               | salivary lipase                            | 1.0           | 13.3        | 12.8 |
|               |                                         |            | CPIJ006549                               | lipase member I                            | 0.1           | 4.4         | 72.7 |
|               |                                         |            | CPIJ008977                               | pyridoxal phosphate phosphatase            | 12.5          | 247.6       | 19.7 |
|               |                                         |            | CPIJ012882                               | argininosuccinate synthase                 | 1.4           | 20.0        | 14.2 |
|               |                                         |            | CPIJ016050                               | hepatic triacylglycerol lipase             | 0.2           | 7.9         | 32.9 |
|               |                                         |            | CPIJ017178                               | myoinositol oxygenase                      | 14.5          | 155.4       | 10.7 |
|               |                                         |            | CPIJ018802                               | endochitinase A                            | 0.3           | 4.7         | 16.1 |
|               | CPIJ000040                              |            | UDP-glucuronosyltransferase 2B1          | 2.1                                        | 51.6          | 24.1        |      |
|               | CPIJ015713                              |            | conserved hypothetical protein           | 8.8                                        | 84.8          | 9.6         |      |
| CPIJ019044    | 15.3 kDa basic salivary protein         |            | 1.5                                      | 67.3                                       | 46.2          |             |      |
| CPIJ000294    | cytochrome P450 4C1                     |            | 3.2                                      | 25.6                                       | 8.0           |             |      |
| CPIJ005952    | cytochrome P450                         |            | 11.9                                     | 339.4                                      | 28.4          |             |      |
| CPIJ009032    | larval serum protein 2                  |            | 1.9                                      | 22.7                                       | 12.2          |             |      |
| CPIJ010225    | cytochrome P450 12b1, mitochondrial     |            | 1.7                                      | 15.0                                       | 9.0           |             |      |
| CPIJ010227    | cytochrome P450 12b1, mitochondrial     |            | 2.8                                      | 32.0                                       | 11.5          |             |      |
| CPIJ010546    | cytochrome P450 9c1                     |            | 0.1                                      | 7.7                                        | 106.0         |             |      |
| CPIJ011837    | cytochrome P450                         |            | 5.1                                      | 58.3                                       | 11.4          |             |      |
| CPIJ011996    | 10-formyltetrahydrofolate dehydrogenase |            | 3.4                                      | 62.5                                       | 18.3          |             |      |
| CPIJ012470    | cytochrome P450 9b2                     |            | 5.6                                      | 60.9                                       | 10.9          |             |      |
| CPIJ019586    | cytochrome P450 6d3                     |            | 2.2                                      | 19.2                                       | 8.7           |             |      |
| CPIJ019587    | cytochrome P450 6d3                     |            | 6.3                                      | 57.8                                       | 9.1           |             |      |
| CPIJ020018    | cytochrome P450 6d3                     |            | 7.1                                      | 70.8                                       | 10.0          |             |      |
| CPIJ000021    | salivary protein                        |            | 5.9                                      | 135.2                                      | 23.0          |             |      |
| CPIJ004030    | venom allergen                          |            | 0.6                                      | 8.2                                        | 13.5          |             |      |
| CPIJ015956    | glycine N-methyltransferase             |            | 2.2                                      | 31.1                                       | 13.9          |             |      |
| No Annotation | CPIJ000835                              |            | chymotrypsin-2                           | 5.6                                        | 111.7         | 20.0        |      |
|               | CPIJ001276                              | defensin-A | 18.5                                     | 154.3                                      | 8.4           |             |      |

|            |                                                  |       |        |       |
|------------|--------------------------------------------------|-------|--------|-------|
| CPIJ001685 | conserved hypothetical protein                   | 0.8   | 15.2   | 19.0  |
| CPIJ001686 | conserved hypothetical protein                   | 0.3   | 11.6   | 39.1  |
| CPIJ002046 | salivary protein                                 | 1.8   | 84.0   | 46.6  |
| CPIJ002089 | salivary protein                                 | 7.8   | 183.4  | 23.6  |
| CPIJ002476 | hypothetical protein                             | 2.9   | 50.5   | 17.6  |
| CPIJ002532 | sodium-dependent multivitamin transporter        | 4.1   | 35.7   | 8.6   |
| CPIJ003019 | conserved hypothetical protein                   | 1.4   | 21.9   | 15.3  |
| CPIJ003054 | conserved hypothetical protein                   | 0.1   | 8.0    | 58.9  |
| CPIJ003129 | conserved hypothetical protein                   | 1.6   | 14.0   | 8.5   |
| CPIJ003456 | uricase                                          | 5.1   | 91.6   | 18.1  |
| CPIJ003468 | hypothetical protein                             | 151.1 | 3496.9 | 23.1  |
| CPIJ003615 | salivary protein                                 | 21.6  | 368.5  | 17.1  |
| CPIJ003879 | lipid storage droplets surface-binding protein 1 | 22.9  | 239.8  | 10.5  |
| CPIJ004054 | hypothetical protein                             | 0.2   | 5.9    | 23.9  |
| CPIJ004641 | trypsin                                          | 0.5   | 135.2  | 286.0 |
| CPIJ005906 | conserved hypothetical protein                   | 2.3   | 41.6   | 17.9  |
| CPIJ005910 | 7.8 kDa basic salivary peptide                   | 22.7  | 191.1  | 8.4   |
| CPIJ006908 | carboxylesterase-6                               | 9.3   | 102.1  | 11.0  |
| CPIJ007079 | trypsin-1                                        | 70.9  | 928.5  | 13.1  |
| CPIJ007333 | amylase                                          | 2.9   | 65.2   | 22.4  |
| CPIJ007452 | 8.9 kDa basic salivary peptide                   | 12.0  | 311.6  | 26.0  |
| CPIJ007471 | oskar                                            | 2.1   | 44.9   | 21.7  |
| CPIJ007646 | conserved hypothetical protein                   | 0.4   | 200.4  | 458.4 |
| CPIJ007741 | conserved hypothetical protein                   | 5.3   | 42.9   | 8.1   |
| CPIJ007742 | 30.5 kDa secreted protein 30.5k-1                | 3.5   | 40.0   | 11.5  |
| CPIJ007838 | chymotrypsin-2                                   | 3.4   | 36.4   | 10.8  |
| CPIJ008014 | oxidase/peroxidase                               | 3.1   | 101.8  | 33.1  |
| CPIJ008032 | conserved hypothetical protein                   | 0.8   | 7.6    | 9.9   |
| CPIJ008464 | hypothetical protein                             | 0.3   | 69.0   | 235.6 |
| CPIJ008471 | hypothetical protein                             | 6.8   | 269.7  | 39.5  |
| CPIJ008479 | 9.7 kDa salivary peptide                         | 6.4   | 146.7  | 22.9  |
| CPIJ010046 | threonine-rich salivary mucin                    | 27.5  | 394.3  | 14.3  |
| CPIJ010333 | conserved hypothetical protein                   | 1.5   | 26.0   | 17.6  |
| CPIJ010337 | hypothetical protein                             | 2.9   | 1053.0 | 365.9 |
| CPIJ010338 | conserved hypothetical protein                   | 4.6   | 684.0  | 149.2 |
| CPIJ010339 | conserved hypothetical protein                   | 1.0   | 173.3  | 182.4 |
| CPIJ010699 | cecropin A                                       | 12.3  | 190.6  | 15.5  |
| CPIJ010772 | 16 kDa salivary peptide                          | 0.2   | 43.1   | 259.7 |
| CPIJ010773 | 16.8 kDa salivary peptide                        | 0.2   | 29.5   | 183.0 |
| CPIJ010792 | 16.7 kDa salivary peptide                        | 0.3   | 10.6   | 33.7  |
| CPIJ011013 | apyrase                                          | 2.8   | 24.5   | 8.8   |
| CPIJ011505 | conserved hypothetical protein                   | 19.7  | 193.9  | 9.9   |
| CPIJ012056 | sodium-dependent serotonin transporter           | 2.5   | 56.8   | 22.4  |
| CPIJ012254 | conserved hypothetical protein                   | 1.3   | 36.5   | 29.1  |
| CPIJ012707 | wnt inhibitory factor 1                          | 3.6   | 108.3  | 30.4  |
| CPIJ012708 | wnt inhibitory factor 1                          | 2.2   | 111.2  | 51.0  |
| CPIJ012783 | 7.7 kDa salivary cysteine-rich peptide           | 2.0   | 34.5   | 17.6  |
| CPIJ012900 | als                                              | 1.4   | 20.5   | 14.8  |
| CPIJ013450 | hypothetical protein                             | 0.2   | 5.0    | 20.9  |
| CPIJ013702 | 17.2 kDa salivary peptide                        | 8.7   | 136.2  | 15.6  |
| CPIJ013705 | conserved hypothetical protein                   | 13.1  | 127.3  | 9.7   |
| CPIJ013706 | conserved hypothetical protein                   | 11.0  | 129.7  | 11.8  |
| CPIJ014402 | hypothetical protein                             | 0.2   | 13.1   | 75.5  |
| CPIJ014545 | short form D7clu32 salivary protein              | 1.0   | 13.3   | 13.7  |
| CPIJ014861 | conserved hypothetical protein                   | 4.8   | 47.8   | 9.9   |
| CPIJ015385 | vitellogenin                                     | 0.3   | 54.3   | 158.5 |
| CPIJ015502 | 16.8 kDa salivary protein                        | 0.7   | 41.0   | 60.1  |
| CPIJ015613 | galactose-specific C-type lectin                 | 2.4   | 124.0  | 51.8  |
| CPIJ015614 | galactose-specific C-type lectin                 | 3.0   | 208.0  | 68.8  |
| CPIJ015615 | salivary C-type lectin                           | 2.1   | 33.4   | 16.2  |
| CPIJ015774 | 34 kDa salivary secreted protein 34k-2           | 0.3   | 4.8    | 16.8  |
| CPIJ016318 | larval cuticle protein 8.7                       | 102.4 | 3783.8 | 37.0  |
| CPIJ016702 | calbindin-32                                     | 10.9  | 223.0  | 20.5  |
| CPIJ016792 | hypothetical protein                             | 1.0   | 16.4   | 17.0  |
| CPIJ016936 | Trypsin                                          | 1.3   | 47.5   | 36.7  |

|                          |            |                                                                                  |        |         |        |
|--------------------------|------------|----------------------------------------------------------------------------------|--------|---------|--------|
|                          | CPIJ016972 | salivary secreted protein 62k-3                                                  | 1.0    | 14.2    | 14.8   |
|                          | CPIJ017043 | hypothetical protein                                                             | 4.9    | 104.4   | 21.2   |
|                          | CPIJ017044 | hypothetical protein                                                             | 1.9    | 91.3    | 47.5   |
|                          | CPIJ017687 | conserved hypothetical protein                                                   | 4.6    | 81.3    | 17.8   |
|                          | CPIJ017960 | hypothetical protein                                                             | 4.6    | 117.3   | 25.2   |
|                          | CPIJ018205 | chymotrypsin-2                                                                   | 2.2    | 23.0    | 10.3   |
|                          | CPIJ018773 | hypothetical protein                                                             | 8348.3 | 68893.7 | 8.3    |
|                          | CPIJ018872 | salivary mucin                                                                   | 0.5    | 18.6    | 37.9   |
|                          | CPIJ019040 | 15.8 kDa salivary peptide                                                        | 12.9   | 313.1   | 24.4   |
|                          | CPIJ019051 | 16.7 kDa salivary peptide                                                        | 0.6    | 63.0    | 104.6  |
|                          | CPIJ019052 | 13.1 kDa salivary protein                                                        | 0.3    | 70.6    | 216.7  |
|                          | CPIJ019055 | 17.5 kDa salivary peptide                                                        | 0.4    | 60.8    | 137.1  |
|                          | CPIJ019252 | salivary mucin                                                                   | 0.3    | 32.7    | 96.0   |
|                          | CPIJ019253 | apyrase                                                                          | 0.2    | 9.3     | 42.8   |
|                          | CPIJ019268 | calbindin-32                                                                     | 14.8   | 237.5   | 16.0   |
|                          | CPIJ019284 | hypothetical protein                                                             | 6.6    | 116.4   | 17.6   |
|                          | CPIJ019552 | calbindin-32                                                                     | 9.1    | 198.1   | 21.8   |
|                          | CPIJ019905 | hypothetical protein                                                             | 10.5   | 886.2   | 84.7   |
|                          | CPIJ019944 | hypothetical protein                                                             | 9.5    | 132.9   | 14.0   |
|                          | CPIJ019945 | hypothetical protein                                                             | 6.9    | 101.9   | 14.7   |
| Regulation               | CPIJ010170 | conserved hypothetical protein                                                   | 0.3    | 4.9     | 17.6   |
|                          | CPIJ010171 | conserved hypothetical protein                                                   | 0.1    | 1.3     | 15.5   |
|                          | CPIJ013451 | zinc finger protein                                                              | 0.2    | 6.2     | 26.8   |
|                          | CPIJ001084 | low molecular weight protein-tyrosine-phosphatase                                | 2.4    | 35.9    | 14.9   |
|                          | CPIJ010312 | conserved hypothetical protein                                                   | 20.2   | 224.9   | 11.1   |
|                          | CPIJ009440 | cytoplasmic polyadenylation element binding protein                              | 0.1    | 4.7     | 32.5   |
|                          | CPIJ004145 | predicted protein                                                                | 1.5    | 18.8    | 12.8   |
|                          | CPIJ007193 | period circadian protein                                                         | 9.1    | 89.2    | 9.9    |
|                          | CPIJ010788 | conserved hypothetical protein                                                   | 12.1   | 98.2    | 8.1    |
|                          | CPIJ014546 | salivary short D7 protein 4                                                      | 1.0    | 22.9    | 22.3   |
|                          | CPIJ014550 | long form D7Bclu1 salivary protein                                               | 1.1    | 19.8    | 17.6   |
|                          | CPIJ014553 | salivary long D7 protein 3                                                       | 5.0    | 57.3    | 11.5   |
|                          | CPIJ015944 | predicted protein                                                                | 0.3    | 8.4     | 30.8   |
| Extra-cellular processes | CPIJ017322 | conserved hypothetical protein                                                   | 46.3   | 5.0     | -9.2   |
| General                  | CPIJ011014 | peptidylglycine alpha-amidating monooxygenase COOH-terminal interactor protein-1 | 18.9   | 2.3     | -8.3   |
|                          | CPIJ000841 | dimeric dihydrodiol dehydrogenase                                                | 420.9  | 10.6    | -39.7  |
|                          | CPIJ005895 | conserved hypothetical protein                                                   | 15.4   | 1.6     | -9.4   |
|                          | CPIJ013724 | dimethylaniline monooxygenase                                                    | 117.3  | 0.6     | -186.6 |
|                          | CPIJ017482 | choline dehydrogenase                                                            | 76.8   | 3.4     | -22.7  |
|                          | CPIJ017483 | glucose dehydrogenase                                                            | 27.2   | 0.3     | -96.4  |
|                          | CPIJ017487 | glucose dehydrogenase                                                            | 1.7    | 0.1     | -23.8  |
| Intra-cellular processes | CPIJ008515 | cellular retinaldehyde binding protein                                           | 190.2  | 17.4    | -10.9  |
|                          | CPIJ008722 | conserved hypothetical protein                                                   | 90.2   | 9.4     | -9.6   |
|                          | CPIJ003915 | chymotrypsin 1                                                                   | 166.1  | 0.5     | -348.2 |
|                          | CPIJ004215 | conserved hypothetical protein                                                   | 16.5   | 1.2     | -13.6  |
|                          | CPIJ004659 | trypsin 7                                                                        | 5.0    | 0.1     | -57.6  |
|                          | CPIJ004660 | trypsin 1                                                                        | 339.9  | 17.5    | -19.4  |
|                          | CPIJ012643 | conserved hypothetical protein                                                   | 57.1   | 1.4     | -39.5  |
|                          | CPIJ017794 | 220 kDa silk protein                                                             | 13.8   | 1.4     | -9.5   |
|                          | CPIJ019781 | trypsin 1                                                                        | 20.4   | 0.4     | -47.1  |
|                          | CPIJ011555 | mitochondrial carrier protein                                                    | 105.9  | 11.4    | -9.3   |
| Metabolism               | CPIJ002066 | alpha-galactosidase A                                                            | 23.8   | 1.6     | -15.0  |
|                          | CPIJ010945 | acidic mammalian chitinase                                                       | 43.0   | 3.4     | -12.7  |
|                          | CPIJ002725 | lipase 1                                                                         | 58.4   | 0.9     | -67.8  |
|                          | CPIJ004802 | endothelial lipase                                                               | 3.1    | 0.2     | -15.9  |
|                          | CPIJ013029 | esterase FE4                                                                     | 1.9    | 0.1     | -16.2  |
|                          | CPIJ011840 | cytochrome P450                                                                  | 33.6   | 0.9     | -35.9  |
|                          | CPIJ011841 | cytochrome P450                                                                  | 34.7   | 1.9     | -17.8  |
|                          | CPIJ015954 | cytochrome P450                                                                  | 14.8   | 1.6     | -9.4   |
|                          | CPIJ015960 | cytochrome P450 4A6                                                              | 152.1  | 14.1    | -10.8  |
|                          | CPIJ015961 | cytochrome P450                                                                  | 37.0   | 2.5     | -15.1  |
|                          | CPIJ017484 | glucose dehydrogenase                                                            | 26.2   | 0.4     | -67.3  |

|               |             |                                  |                                     |                                  |        |        |       |
|---------------|-------------|----------------------------------|-------------------------------------|----------------------------------|--------|--------|-------|
| No Annotation | CPIJ000499  | hypothetical protein             | 10.5                                | 0.3                              | -30.6  |        |       |
|               | CPIJ001222  | conserved hypothetical protein   | 252.2                               | 2.0                              | -126.7 |        |       |
|               | CPIJ001839  | cuticle protein                  | 54.4                                | 1.0                              | -56.9  |        |       |
|               | CPIJ002800  | larval/pupal cuticle protein H1C | 16.4                                | 0.5                              | -31.9  |        |       |
|               | CPIJ002801  | larval/pupal cuticle protein H1C | 9.3                                 | 0.5                              | -17.6  |        |       |
|               | CPIJ003026  | conserved hypothetical protein   | 13.6                                | 0.2                              | -87.2  |        |       |
|               | CPIJ004287  | conserved hypothetical protein   | 22.5                                | 2.6                              | -8.6   |        |       |
|               | CPIJ004288  | cuticle protein                  | 8.8                                 | 0.7                              | -13.2  |        |       |
|               | CPIJ004290  | cuticle protein                  | 249.6                               | 7.6                              | -32.8  |        |       |
|               | CPIJ004293  | cuticle protein                  | 88.7                                | 2.8                              | -31.4  |        |       |
|               | CPIJ004475  | conserved hypothetical protein   | 210.1                               | 5.1                              | -41.3  |        |       |
|               | CPIJ005176  | G12                              | 11.3                                | 0.3                              | -33.1  |        |       |
|               | CPIJ006327  | metalloproteinase                | 29.1                                | 0.4                              | -65.9  |        |       |
|               | CPIJ007055  | SEC14                            | 77.9                                | 6.1                              | -12.9  |        |       |
|               | CPIJ007056  | conserved hypothetical protein   | 71.0                                | 4.8                              | -14.8  |        |       |
|               | CPIJ007448  | conserved hypothetical protein   | 12.7                                | 0.4                              | -28.8  |        |       |
|               | CPIJ008211  | conserved hypothetical protein   | 270.1                               | 0.8                              | -323.1 |        |       |
|               | CPIJ008231  | pupal cuticle protein            | 123.2                               | 4.3                              | -28.9  |        |       |
|               | CPIJ008286  | serine protease                  | 813.0                               | 16.9                             | -48.2  |        |       |
|               | CPIJ008659  | metalloproteinase                | 15.8                                | 0.2                              | -95.0  |        |       |
|               | CPIJ008974  | cuticle protein                  | 28.6                                | 0.9                              | -32.7  |        |       |
|               | CPIJ009098  | conserved hypothetical protein   | 1444.0                              | 24.9                             | -58.1  |        |       |
|               | CPIJ009099  | conserved hypothetical protein   | 1853.0                              | 57.2                             | -32.4  |        |       |
|               | CPIJ009207  | conserved hypothetical protein   | 19.9                                | 0.3                              | -74.2  |        |       |
|               | CPIJ009585  | hypothetical protein             | 143.3                               | 0.5                              | -265.3 |        |       |
|               | CPIJ011001  | sulfotransferase                 | 5.0                                 | 0.3                              | -19.1  |        |       |
|               | CPIJ012507  | conserved hypothetical protein   | 104.1                               | 2.0                              | -51.9  |        |       |
|               | CPIJ013663  | elongase                         | 179.3                               | 9.9                              | -18.1  |        |       |
|               | CPIJ013764  | cuticle protein 7                | 12.7                                | 0.9                              | -14.9  |        |       |
|               | CPIJ013765  | cuticle protein 18.6             | 44.4                                | 2.0                              | -22.5  |        |       |
|               | CPIJ013931  | conserved hypothetical protein   | 5.3                                 | 0.3                              | -16.0  |        |       |
|               | CPIJ014435  | hypothetical protein             | 89.0                                | 0.7                              | -120.9 |        |       |
|               | CPIJ014778  | conserved hypothetical protein   | 39.4                                | 3.0                              | -13.1  |        |       |
|               | CPIJ015291  | hypothetical protein             | 8.3                                 | 0.1                              | -66.9  |        |       |
|               | CPIJ016716  | conserved hypothetical protein   | 59.8                                | 4.9                              | -12.2  |        |       |
|               | CPIJ017020  | hypothetical protein             | 30.9                                | 0.1                              | -268.6 |        |       |
|               | CPIJ017620  | hypothetical protein             | 2100.1                              | 8.7                              | -240.2 |        |       |
|               | CPIJ017806  | conserved hypothetical protein   | 31.1                                | 2.2                              | -14.3  |        |       |
|               | CPIJ017862  | sulfotransferase                 | 6.3                                 | 0.5                              | -12.8  |        |       |
|               | CPIJ018582  | pupal cuticle protein            | 140.8                               | 5.0                              | -27.9  |        |       |
|               | CPIJ018910  | conserved hypothetical protein   | 64.9                                | 5.7                              | -11.3  |        |       |
|               | CPIJ019396  | hypothetical protein             | 267.8                               | 23.7                             | -11.3  |        |       |
|               | Regulation  | CPIJ012716                       | odorant-binding protein             | 134.0                            | 2.8    | -48.2  |       |
|               |             | CPIJ012719                       | general odorant-binding protein 56d | 679.5                            | 47.9   | -14.2  |       |
|               |             | CPIJ012721                       | odorant-binding protein             | 59.0                             | 1.0    | -57.7  |       |
|               |             | CPIJ018956                       | general odorant-binding protein 56d | 523.0                            | 42.4   | -12.3  |       |
|               | 12 v 24h    | Extra-cellular processes         | CPIJ018858                          | fibrinogen and fibronectin       | 4.1    | 70.7   | 17.2  |
|               |             |                                  | CPIJ002173                          | conserved hypothetical protein   | 6.2    | 60.0   | 9.6   |
|               |             |                                  | CPIJ014105                          | galactose-specific C-type lectin | 1.7    | 24.1   | 13.8  |
|               | Information | Intra-cellular processes         | CPIJ017289                          | conserved hypothetical protein   | 0.0    | 3.5    | N/C*  |
|               |             |                                  | CPIJ000214                          | serpin B10                       | 9.2    | 122.6  | 13.3  |
|               | Metabolism  |                                  | CPIJ005273                          | trypsin 2                        | 76.8   | 7233.8 | 94.2  |
|               |             |                                  | CPIJ011998                          | zinc carboxypeptidase A 1        | 23.8   | 321.9  | 13.5  |
|               |             |                                  | CPIJ014254                          | chymotrypsin B1                  | 0.4    | 11.6   | 29.0  |
|               |             |                                  | CPIJ015161                          | chymotrypsin 1                   | 0.1    | 24.6   | 172.0 |
|               |             |                                  | CPIJ015162                          | serine-type endopeptidase        | 0.1    | 9.7    | 86.6  |
|               |             |                                  | CPIJ017414                          | trypsin 4                        | 19.6   | 368.2  | 18.8  |
|               |             |                                  | CPIJ017964                          | trypsin 7                        | 13.0   | 110.5  | 8.5   |
|               |             |                                  | CPIJ017575                          | low-density lipoprotein receptor | 12.7   | 120.0  | 9.4   |
|               |             |                                  | CPIJ002715                          | lipase 3                         | 0.4    | 9.8    | 23.4  |
| CPIJ001886    |             |                                  | cytochrome P450 4C1                 | 0.0                              | 2.9    | 66.5   |       |
| No Annotation |             | CPIJ006840                       | CD109 antigen                       | 0.4                              | 4.7    | 10.9   |       |
|               |             | CPIJ000529                       | conserved hypothetical protein      | 0.1                              | 3.5    | 60.6   |       |
|               |             | CPIJ000835                       | chymotrypsin-2                      | 111.7                            | 4177.6 | 37.4   |       |

|                          |                          |                                                   |        |       |        |
|--------------------------|--------------------------|---------------------------------------------------|--------|-------|--------|
|                          |                          | CPIJ001237 conserved hypothetical protein         | 3.2    | 32.4  | 10.0   |
|                          |                          | CPIJ004491 sodium/potassium/calcium exchanger 3   | 1.9    | 16.9  | 9.0    |
|                          |                          | CPIJ005637 conserved hypothetical protein         | 0.0    | 0.1   | 0.0    |
|                          |                          | CPIJ006087 sodium/solute symporter                | 1.3    | 15.1  | 11.9   |
|                          |                          | CPIJ008023 olfactory receptor                     | 0.1    | 3.9   | 35.5   |
|                          |                          | CPIJ012164 conserved hypothetical protein         | 0.1    | 16.4  | 177.5  |
|                          |                          | CPIJ014969 caldecrin                              | 2.4    | 33.1  | 13.7   |
|                          |                          | CPIJ015718 arginase                               | 2.1    | 18.6  | 9.0    |
| Regulation               |                          | CPIJ015936 hypothetical protein                   | 0.7    | 6.9   | 10.4   |
| Extra-cellular processes |                          | CPIJ011368 f-box/lrr protein                      | 69.9   | 2.1   | -32.9  |
| Intra-cellular processes |                          | CPIJ000521 sodium-dependent phosphate transporter | 4.2    | 0.3   | -12.5  |
|                          |                          | CPIJ010466 laccase-like multicopper oxidase 1     | 6.8    | 0.6   | -12.3  |
|                          |                          | CPIJ016802 laccase-like multicopper oxidase 1     | 9.7    | 0.9   | -10.4  |
|                          |                          | CPIJ011997 zinc carboxypeptidase A 1              | 68.8   | 1.2   | -56.8  |
|                          |                          | CPIJ012680 ADAM 12                                | 23.8   | 2.1   | -11.2  |
|                          |                          | CPIJ016937 coagulation factor X                   | 37.5   | 3.8   | -9.9   |
| Metabolism               |                          | CPIJ000679 conserved hypothetical protein         | 142.5  | 14.0  | -10.1  |
|                          |                          | CPIJ000680 conserved hypothetical protein         | 384.3  | 19.9  | -19.3  |
|                          |                          | CPIJ007603 conserved hypothetical protein         | 325.4  | 25.3  | -12.8  |
|                          |                          | CPIJ010945 acidic mammalian chitinase             | 3.4    | 0.3   | -10.6  |
|                          |                          | CPIJ012316 conserved hypothetical protein         | 30.6   | 3.6   | -8.6   |
|                          |                          | CPIJ005936 carbonic anhydrase II                  | 9.9    | 0.2   | -43.7  |
|                          |                          | CPIJ006311 conserved hypothetical protein         | 56.7   | 6.3   | -9.0   |
|                          |                          | CPIJ011837 cytochrome P450                        | 58.3   | 3.4   | -17.0  |
| No Annotation            |                          | CPIJ000641 salivary asparagine-rich mucin         | 134.3  | 1.7   | -79.1  |
|                          |                          | CPIJ001605 pro-resilin                            | 37.8   | 1.6   | -23.2  |
|                          |                          | CPIJ002016 conserved hypothetical protein         | 19.2   | 2.2   | -8.9   |
|                          |                          | CPIJ003019 conserved hypothetical protein         | 21.9   | 0.8   | -27.8  |
|                          |                          | CPIJ003030 adult cuticle protein                  | 13.2   | 0.2   | -57.7  |
|                          |                          | CPIJ003473 cuticle protein                        | 337.4  | 16.8  | -20.1  |
|                          |                          | CPIJ003474 cuticle protein                        | 1824.0 | 129.9 | -14.0  |
|                          |                          | CPIJ005336 conserved hypothetical protein         | 23.8   | 1.7   | -14.0  |
|                          |                          | CPIJ006195 hypothetical protein                   | 16.2   | 0.5   | -33.3  |
|                          |                          | CPIJ006794 conserved hypothetical protein         | 141.5  | 15.8  | -9.0   |
|                          |                          | CPIJ006796 conserved hypothetical protein         | 124.6  | 13.6  | -9.2   |
|                          |                          | CPIJ006797 conserved hypothetical protein         | 196.3  | 20.1  | -9.8   |
|                          |                          | CPIJ008231 pupal cuticle protein                  | 4.3    | 0.3   | -13.7  |
|                          |                          | CPIJ008489 conserved hypothetical protein         | 65.9   | 6.4   | -10.3  |
|                          |                          | CPIJ009100 conserved hypothetical protein         | 586.3  | 21.4  | -27.4  |
|                          |                          | CPIJ009334 conserved hypothetical protein         | 113.3  | 2.3   | -48.9  |
|                          |                          | CPIJ010338 conserved hypothetical protein         | 684.0  | 55.7  | -12.3  |
|                          |                          | CPIJ010705 conserved hypothetical protein         | 32.8   | 2.2   | -14.9  |
|                          |                          | CPIJ012090 actin                                  | 373.3  | 24.4  | -15.3  |
|                          |                          | CPIJ012641 pupal cuticle protein                  | 18.6   | 0.5   | -34.8  |
|                          |                          | CPIJ012973 conserved hypothetical protein         | 5.6    | 0.4   | -15.1  |
|                          |                          | CPIJ013278 conserved hypothetical protein         | 31.8   | 0.6   | -52.8  |
|                          |                          | CPIJ013783 pupal cuticle protein                  | 31.9   | 1.7   | -19.3  |
|                          |                          | CPIJ013785 conserved hypothetical protein         | 828.9  | 2.6   | -321.8 |
|                          |                          | CPIJ015249 hypothetical protein                   | 12.0   | 1.4   | -8.4   |
|                          |                          | CPIJ015250 hypothetical protein                   | 61.0   | 5.3   | -11.5  |
|                          |                          | CPIJ016655 conserved hypothetical protein         | 733.3  | 45.9  | -16.0  |
|                          |                          | CPIJ016702 calbindin-32                           | 223.0  | 22.7  | -9.8   |
|                          |                          | CPIJ016842 conserved hypothetical protein         | 16.4   | 1.2   | -13.6  |
|                          |                          | CPIJ017736 conserved hypothetical protein         | 184.0  | 16.8  | -11.0  |
|                          |                          | CPIJ017876 cuticle protein                        | 306.8  | 13.5  | -22.7  |
|                          |                          | CPIJ019699 structural contituent of cuticle       | 145.7  | 11.3  | -12.9  |
|                          |                          | CPIJ019849 conserved hypothetical protein         | 13.9   | 1.5   | -9.5   |
|                          |                          | CPIJ019982 conserved hypothetical protein         | 10.7   | 0.9   | -11.5  |
| Regulation               |                          | CPIJ000274 conserved hypothetical protein         | 28.1   | 1.8   | -15.3  |
|                          |                          | CPIJ011799 conserved hypothetical protein         | 15.7   | 1.7   | -9.2   |
| 24 v 36h                 | Extra-cellular processes | CPIJ000931 conserved hypothetical protein         | 12.6   | 1.3   | -9.7   |
|                          |                          | CPIJ011371 f-box/lrr protein                      | 23.1   | 1.8   | -12.8  |
|                          | Information              | CPIJ017289 conserved hypothetical protein         | 3.5    | 0.0   | 0.0    |
|                          | Intra-cellular processes | CPIJ000214 serpin B10                             | 122.6  | 4.4   | -27.9  |

|                          |                          |                          |                                    |                                |      |        |       |
|--------------------------|--------------------------|--------------------------|------------------------------------|--------------------------------|------|--------|-------|
| No Annotation            |                          | CPIJ003470               | hypothetical protein               | 2549.0                         | 37.8 | -67.5  |       |
|                          |                          | CPIJ003473               | cuticle protein                    | 16.8                           | 0.5  | -31.9  |       |
|                          |                          | CPIJ003474               | cuticle protein                    | 129.9                          | 2.4  | -53.9  |       |
|                          |                          | CPIJ003476               | cuticle protein                    | 1099.5                         | 17.3 | -63.7  |       |
|                          |                          | CPIJ003477               | cuticle protein                    | 1043.6                         | 16.9 | -61.7  |       |
|                          |                          | CPIJ009100               | conserved hypothetical protein     | 21.4                           | 1.7  | -13.0  |       |
|                          |                          | CPIJ009101               | hypothetical protein               | 80.5                           | 6.0  | -13.4  |       |
|                          |                          | CPIJ009111               | conserved hypothetical protein     | 50.0                           | 5.2  | -9.6   |       |
|                          |                          | CPIJ012090               | actin                              | 24.4                           | 2.5  | -9.8   |       |
|                          |                          | CPIJ017874               | hypothetical protein               | 490.3                          | 9.7  | -50.5  |       |
|                          |                          | CPIJ017875               | hypothetical protein               | 1222.8                         | 30.2 | -40.5  |       |
|                          |                          | CPIJ018642               | pupal cuticle protein              | 80.3                           | 8.5  | -9.4   |       |
|                          |                          | CPIJ018939               | oxidoreductase                     | 0.1                            | 0.0  | 0.0    |       |
|                          | 36 v 48h                 | Metabolism               | CPIJ006495                         | conserved hypothetical protein | 2.3  | 21.0   | 9.2   |
| Intra-cellular processes |                          | CPIJ000990               | cytosol aminopeptidase             | 6.6                            | 0.1  | -79.3  |       |
|                          |                          | CPIJ002595               | zinc carboxypeptidase              | 19.0                           | 0.1  | -170.8 |       |
|                          |                          | CPIJ003539               | cytosol aminopeptidase             | 6.2                            | 0.0  | -146.0 |       |
| Metabolism               |                          | CPIJ004028               | venom allergen 3                   | 14.2                           | 0.4  | -36.0  |       |
| No Annotation            |                          | CPIJ007077               | trypsin-4                          | 9.5                            | 0.4  | -26.2  |       |
|                          |                          | CPIJ010092               | ficolin-3                          | 15.2                           | 0.3  | -44.5  |       |
|                          |                          | CPIJ010778               | conserved hypothetical protein     | 6.1                            | 0.6  | -10.5  |       |
|                          |                          | CPIJ011171               | LWamide neuropeptides              | 47.7                           | 0.3  | -178.1 |       |
|                          |                          | CPIJ011620               | conserved hypothetical protein     | 1.4                            | 0.0  | -63.2  |       |
|                          |                          | CPIJ016384               | conserved hypothetical protein     | 12.2                           | 0.2  | -56.0  |       |
| Regulation               |                          | CPIJ015944               | predicted protein                  | 18.2                           | 0.3  | -57.2  |       |
| 48 v 60h                 |                          | Intra-cellular processes | CPIJ000990                         | cytosol aminopeptidase         | 0.1  | 2.3    | 27.2  |
|                          |                          |                          | CPIJ002595                         | zinc carboxypeptidase          | 0.1  | 18.2   | 163.7 |
|                          |                          | CPIJ003539               | cytosol aminopeptidase             | 0.0                            | 3.0  | 70.3   |       |
|                          | Metabolism               | CPIJ014185               | conserved hypothetical protein     | 1.0                            | 14.8 | 15.0   |       |
|                          |                          | CPIJ004028               | venom allergen 3                   | 0.4                            | 12.6 | 31.9   |       |
|                          | No Annotation            | CPIJ007077               | trypsin-4                          | 0.4                            | 9.6  | 26.5   |       |
|                          |                          | CPIJ010092               | ficolin-3                          | 0.3                            | 9.0  | 26.5   |       |
|                          |                          | CPIJ011171               | LWamide neuropeptides              | 0.3                            | 38.8 | 144.9  |       |
|                          |                          | CPIJ016384               | conserved hypothetical protein     | 0.2                            | 15.0 | 68.8   |       |
|                          | Regulation               | CPIJ015944               | predicted protein                  | 0.3                            | 7.7  | 24.1   |       |
| 60 v 72h                 | Intra-cellular processes | CPIJ002595               | zinc carboxypeptidase              | 18.2                           | 2.2  | -8.4   |       |
|                          | Metabolism               | CPIJ009796               | lipoprotein lipase                 | 5.0                            | 0.4  | -12.0  |       |
|                          | No Annotation            | CPIJ001231               | conserved hypothetical protein     | 10.7                           | 0.2  | -53.7  |       |
|                          |                          | CPIJ015506               | hypothetical protein               | 60.2                           | 3.0  | -19.9  |       |
|                          |                          | CPIJ016394               | nuclear pore complex protein Nup93 | 0.4                            | 0.0  | -23.7  |       |

<sup>†</sup>Structural Classification of Proteins (SCOP) database for the *Culex quinquefasciatus* database (v1.73).  
<http://supfam.cs.bris.ac.uk/SUPERFAMILY/>

<sup>‡</sup>Vectorbase annotation for the Johannesburg strain of *Cx. quinquefasciatus* JHBv1.2.

<http://www.vectorbase.org/>

\*[Paired end] Fragments Per Kilo bases of gene length per Million RNA-Seq reads mapped. Time 1 and 2 represent the earlier and later time points in the comparison, respectively.

\*\*N/C= Not calculable
